# Supplementary material for: Chronic Obstructive Pulmonary Disease (COPD): Mortality Trends and Epidemiological Analysis (1999–2020)
Source: Research Square preprint supplement (doi:10.21203/rs.3.rs-7054383/v1), 2025-09-22
Supplement: Supplementary file 1 [file a4ac66af0d27959dad9b2527.docx]

**Supplemental Table 1: COPD-Related Deaths per 100,000 in the United States, 1999 to 2020**

|  | Deaths | | | | | | |
| --- | --- | --- | --- | --- | --- | --- | --- |
| Year | **Female** | **Male** | **NH White** | **NH Black or African American** | **Asian or Pacific Islander** | **American Indian or Alaska Native** | **Hispanic or Latino** |
| 1999 | 97742 | 112434 | 189297 | 13238 | 1590 | 641 | 4823 |
| 2000 | 98349 | 110254 | 188201 | 12758 | 1641 | 697 | 4746 |
| 2001 | 101399 | 110343 | 190823 | 12773 | 1788 | 724 | 5083 |
| 2002 | 103951 | 112315 | 194547 | 13199 | 1780 | 783 | 5403 |
| 2003 | 106528 | 113114 | 197508 | 13315 | 1836 | 864 | 5592 |
| 2004 | 105188 | 111337 | 194472 | 13170 | 1868 | 946 | 5640 |
| 2005 | 112313 | 117280 | 205647 | 14254 | 2045 | 943 | 6318 |
| 2006 | 109770 | 114656 | 200687 | 14039 | 2155 | 1003 | 6108 |
| 2007 | 111000 | 115550 | 202607 | 14177 | 2157 | 1091 | 6217 |
| 2008 | 118175 | 120823 | 213132 | 15282 | 2328 | 1058 | 6766 |
| 2009 | 116527 | 119715 | 210304 | 15113 | 2409 | 1112 | 6889 |
| 2010 | 119362 | 122799 | 214952 | 15744 | 2487 | 1260 | 7278 |
| 2011 | 124627 | 127595 | 223776 | 16418 | 2647 | 1256 | 7688 |
| 2012 | 126329 | 129372 | 225923 | 17107 | 2636 | 1303 | 8120 |
| 2013 | 131787 | 134272 | 234189 | 18176 | 2969 | 1419 | 8683 |
| 2014 | 130246 | 133625 | 231695 | 18195 | 2943 | 1520 | 8709 |
| 2015 | 138599 | 139312 | 243372 | 19374 | 3147 | 1652 | 9359 |
| 2016 | 138715 | 142672 | 245336 | 20482 | 3203 | 1709 | 9821 |
| 2017 | 145140 | 146623 | 253727 | 21339 | 3461 | 1890 | 10360 |
| 2018 | 145239 | 148277 | 254254 | 22275 | 3551 | 1855 | 10732 |
| 2019 | 144907 | 148422 | 253983 | 22423 | 3485 | 1890 | 10795 |
| 2020 | 158463 | 166540 | 275907 | 28045 | 4304 | 2146 | 13785 |

**Supplemental Table 2: Overall COPD-Related Age-Adjusted Mortality Rates per 100,000 in the United States, 1999 to 2020**

| Age Adjusted Rate (95% CI) OVERALL | | | |
| --- | --- | --- | --- |
| Year | Age Adjusted Rate | Age Adjusted Rate Lower 95% Confidence Interval | Age Adjusted Rate Upper 95% Confidence Interval |
| 1999 | 118.986 | 118.477 | 119.495 |
| 2000 | 116.804 | 116.303 | 117.305 |
| 2001 | 116.772 | 116.274 | 117.269 |
| 2002 | 117.537 | 117.041 | 118.032 |
| 2003 | 117.498 | 117.007 | 117.99 |
| 2004 | 114.176 | 113.695 | 114.658 |
| 2005 | 118.906 | 118.419 | 119.393 |
| 2006 | 114.131 | 113.658 | 114.604 |
| 2007 | 113.007 | 112.54 | 113.473 |
| 2008 | 116.805 | 116.335 | 117.275 |
| 2009 | 113.151 | 112.693 | 113.61 |
| 2010 | 114.103 | 113.646 | 114.561 |
| 2011 | 115.632 | 115.177 | 116.087 |
| 2012 | 114.082 | 113.636 | 114.528 |
| 2013 | 115.654 | 115.21 | 116.098 |
| 2014 | 111.724 | 111.293 | 112.155 |
| 2015 | 114.798 | 114.366 | 115.23 |
| 2016 | 113.6 | 113.175 | 114.025 |
| 2017 | 114.745 | 114.323 | 115.166 |
| 2018 | 112.488 | 112.077 | 112.899 |
| 2019 | 109.772 | 109.371 | 110.174 |
| 2020 | 119.207 | 118.793 | 119.621 |

**Supplemental Table 3: Sex‐Stratified** **COPD-Related Age-Adjusted Mortality Rates per 100,000 in the United States, 1999 to 2020**

| Age Adjusted Rate (95% CI) SEX (Females) | | | |
| --- | --- | --- | --- |
| Year | Age Adjusted Rate | Age Adjusted Rate Lower 95% Confidence Interval | Age Adjusted Rate Upper 95% Confidence Interval |
| 1999 | 91.585 | 91.008 | 92.162 |
| 2000 | 91.203 | 90.63 | 91.775 |
| 2001 | 92.876 | 92.301 | 93.451 |
| 2002 | 94.1 | 93.525 | 94.675 |
| 2003 | 95.221 | 94.646 | 95.796 |
| 2004 | 93.03 | 92.465 | 93.595 |
| 2005 | 97.774 | 97.199 | 98.35 |
| 2006 | 94.205 | 93.644 | 94.766 |
| 2007 | 93.768 | 93.212 | 94.324 |
| 2008 | 98.102 | 97.538 | 98.666 |
| 2009 | 95.341 | 94.788 | 95.894 |
| 2010 | 96.15 | 95.599 | 96.702 |
| 2011 | 98.111 | 97.559 | 98.663 |
| 2012 | 97.187 | 96.643 | 97.73 |
| 2013 | 99.273 | 98.729 | 99.817 |
| 2014 | 95.997 | 95.467 | 96.526 |
| 2015 | 99.816 | 99.281 | 100.35 |
| 2016 | 98.074 | 97.549 | 98.599 |
| 2017 | 100.153 | 99.629 | 100.676 |
| 2018 | 97.842 | 97.331 | 98.352 |
| 2019 | 95.696 | 95.197 | 96.195 |
| 2020 | 102.729 | 102.217 | 103.241 |

| Age Adjusted Rate (95% CI) SEX (Males) | | | |
| --- | --- | --- | --- |
| Year | Age Adjusted Rate | Age Adjusted Rate Lower 95% Confidence Interval | Age Adjusted Rate Upper 95% Confidence Interval |
| 1999 | 163.796 | 162.82 | 164.772 |
| 2000 | 158.781 | 157.827 | 159.736 |
| 2001 | 155.379 | 154.446 | 156.312 |
| 2002 | 155.299 | 154.375 | 156.224 |
| 2003 | 152.727 | 151.822 | 153.632 |
| 2004 | 147.461 | 146.581 | 148.342 |
| 2005 | 151.476 | 150.596 | 152.356 |
| 2006 | 144.599 | 143.75 | 145.448 |
| 2007 | 141.998 | 141.168 | 142.827 |
| 2008 | 144.779 | 143.952 | 145.606 |
| 2009 | 139.63 | 138.828 | 140.432 |
| 2010 | 140.531 | 139.734 | 141.328 |
| 2011 | 140.94 | 140.156 | 141.725 |
| 2012 | 138.435 | 137.669 | 139.201 |
| 2013 | 138.892 | 138.136 | 139.647 |
| 2014 | 133.759 | 133.029 | 134.489 |
| 2015 | 135.434 | 134.71 | 136.158 |
| 2016 | 134.948 | 134.235 | 135.662 |
| 2017 | 134.646 | 133.944 | 135.348 |
| 2018 | 132.059 | 131.375 | 132.743 |
| 2019 | 128.54 | 127.875 | 129.204 |
| 2020 | 140.93 | 140.242 | 141.618 |

**Supplemental Table 4: Race‐Stratified** **COPD-Related Age-Adjusted Mortality Rates per 100,000 in the United States, 1999 to 2020**

| Age Adjusted Rate (95% CI) AMERICAN INDIAN OR ALASKAN NATIVE | | | |
| --- | --- | --- | --- |
| Year | Age Adjusted Rate | Age Adjusted Rate Lower 95% Confidence Interval | Age Adjusted Rate Upper 95% Confidence Interval |
| 1999 | 94.941 | 87.263 | 102.618 |
| 2000 | 95.227 | 87.869 | 102.585 |
| 2001 | 94.187 | 87.01 | 101.363 |
| 2002 | 103.05 | 95.508 | 110.593 |
| 2003 | 106.865 | 99.346 | 114.384 |
| 2004 | 112.386 | 104.822 | 119.951 |
| 2005 | 108.183 | 100.878 | 115.488 |
| 2006 | 113.519 | 106.096 | 120.942 |
| 2007 | 117.373 | 110 | 124.746 |
| 2008 | 108.129 | 101.214 | 115.045 |
| 2009 | 109.826 | 102.97 | 116.682 |
| 2010 | 122.815 | 115.611 | 130.02 |
| 2011 | 113.869 | 107.206 | 120.532 |
| 2012 | 111.979 | 105.556 | 118.403 |
| 2013 | 115.849 | 109.508 | 122.189 |
| 2014 | 116.703 | 110.538 | 122.868 |
| 2015 | 119.894 | 113.834 | 125.954 |
| 2016 | 117.156 | 111.353 | 122.959 |
| 2017 | 124.817 | 118.953 | 130.68 |
| 2018 | 117.504 | 111.963 | 123.046 |
| 2019 | 113.21 | 107.929 | 118.492 |
| 2020 | 122.448 | 117.101 | 127.795 |

| Age Adjusted Rate (95% CI) ASIAN OR PACIFIC ISLANDER | | | |
| --- | --- | --- | --- |
| Year | Age Adjusted Rate | Age Adjusted Rate Lower 95% Confidence Interval | Age Adjusted Rate Upper 95% Confidence Interval |
| 1999 | 44.79 | 42.507 | 47.072 |
| 2000 | 44.073 | 41.872 | 46.274 |
| 2001 | 43.896 | 41.801 | 45.992 |
| 2002 | 41.465 | 39.49 | 43.441 |
| 2003 | 40.087 | 38.207 | 41.968 |
| 2004 | 38.831 | 37.029 | 40.634 |
| 2005 | 39.366 | 37.622 | 41.11 |
| 2006 | 39.105 | 37.422 | 40.787 |
| 2007 | 37.008 | 35.418 | 38.598 |
| 2008 | 37.704 | 36.147 | 39.261 |
| 2009 | 37.106 | 35.602 | 38.61 |
| 2010 | 36.761 | 35.296 | 38.226 |
| 2011 | 35.901 | 34.516 | 37.285 |
| 2012 | 33.025 | 31.748 | 34.301 |
| 2013 | 34.683 | 33.422 | 35.945 |
| 2014 | 31.702 | 30.543 | 32.861 |
| 2015 | 31.418 | 30.308 | 32.528 |
| 2016 | 30.287 | 29.226 | 31.348 |
| 2017 | 30.682 | 29.649 | 31.715 |
| 2018 | 29.827 | 28.836 | 30.818 |
| 2019 | 27.821 | 26.889 | 28.754 |
| 2020 | 32.303 | 31.329 | 33.277 |

| Age Adjusted Rate (95% CI) BLACK OR AFRICAN AMERICAN | | | |
| --- | --- | --- | --- |
| Year | Age Adjusted Rate | Age Adjusted Rate Lower 95% Confidence Interval | Age Adjusted Rate Upper 95% Confidence Interval |
| 1999 | 91.425 | 89.854 | 92.997 |
| 2000 | 86.882 | 85.36 | 88.403 |
| 2001 | 85.519 | 84.02 | 87.018 |
| 2002 | 86.894 | 85.393 | 88.395 |
| 2003 | 85.94 | 84.46 | 87.421 |
| 2004 | 83.376 | 81.929 | 84.824 |
| 2005 | 87.744 | 86.278 | 89.21 |
| 2006 | 84.242 | 82.822 | 85.663 |
| 2007 | 83.007 | 81.612 | 84.402 |
| 2008 | 86.979 | 85.569 | 88.389 |
| 2009 | 82.986 | 81.63 | 84.341 |
| 2010 | 84.549 | 83.195 | 85.903 |
| 2011 | 85.015 | 83.68 | 86.35 |
| 2012 | 85.277 | 83.965 | 86.59 |
| 2013 | 87.037 | 85.735 | 88.338 |
| 2014 | 83.855 | 82.601 | 85.109 |
| 2015 | 86.043 | 84.795 | 87.291 |
| 2016 | 87.716 | 86.478 | 88.953 |
| 2017 | 88.339 | 87.118 | 89.56 |
| 2018 | 89.178 | 87.973 | 90.383 |
| 2019 | 86.595 | 85.43 | 87.76 |
| 2020 | 105.497 | 104.228 | 106.765 |

| Age Adjusted Rate (95% CI) WHITE | | | |
| --- | --- | --- | --- |
| Year | Age Adjusted Rate | Age Adjusted Rate Lower 95% Confidence Interval | Age Adjusted Rate Upper 95% Confidence Interval |
| 1999 | 126.571 | 126.001 | 127.141 |
| 2000 | 124.913 | 124.348 | 125.477 |
| 2001 | 125.4 | 124.837 | 125.963 |
| 2002 | 126.465 | 125.903 | 127.028 |
| 2003 | 126.9 | 126.34 | 127.46 |
| 2004 | 123.731 | 123.18 | 124.281 |
| 2005 | 129.131 | 128.572 | 129.691 |
| 2006 | 124.292 | 123.747 | 124.838 |
| 2007 | 123.701 | 123.16 | 124.241 |
| 2008 | 128.067 | 127.521 | 128.613 |
| 2009 | 124.592 | 124.057 | 125.128 |
| 2010 | 125.756 | 125.221 | 126.291 |
| 2011 | 128.333 | 127.796 | 128.869 |
| 2012 | 126.858 | 126.33 | 127.386 |
| 2013 | 129.019 | 128.491 | 129.548 |
| 2014 | 125.302 | 124.786 | 125.819 |
| 2015 | 129.243 | 128.723 | 129.764 |
| 2016 | 128.212 | 127.697 | 128.726 |
| 2017 | 129.948 | 129.436 | 130.461 |
| 2018 | 127.505 | 127.003 | 128.007 |
| 2019 | 125.071 | 124.579 | 125.563 |
| 2020 | 134.096 | 133.589 | 134.603 |

| Age Adjusted Rate (95% CI) HISPANICS | | | |
| --- | --- | --- | --- |
| Year | Age Adjusted Rate | Age Adjusted Rate Lower 95% Confidence Interval | Age Adjusted Rate Upper 95% Confidence Interval |
| 1999 | 63.521 | 61.674 | 65.369 |
| 2000 | 59.81 | 58.059 | 61.561 |
| 2001 | 59.936 | 58.24 | 61.632 |
| 2002 | 60.78 | 59.109 | 62.451 |
| 2003 | 59.824 | 58.208 | 61.439 |
| 2004 | 56.897 | 55.365 | 58.43 |
| 2005 | 60.126 | 58.599 | 61.653 |
| 2006 | 55.373 | 53.946 | 56.8 |
| 2007 | 52.982 | 51.629 | 54.335 |
| 2008 | 54.918 | 53.576 | 56.26 |
| 2009 | 52.806 | 51.527 | 54.085 |
| 2010 | 53.55 | 52.289 | 54.811 |
| 2011 | 52.343 | 51.147 | 53.539 |
| 2012 | 52.292 | 51.13 | 53.454 |
| 2013 | 52.403 | 51.277 | 53.529 |
| 2014 | 49.152 | 48.097 | 50.207 |
| 2015 | 49.727 | 48.698 | 50.757 |
| 2016 | 49.451 | 48.45 | 50.452 |
| 2017 | 49.471 | 48.496 | 50.445 |
| 2018 | 48.903 | 47.958 | 49.849 |
| 2019 | 47.073 | 46.166 | 47.98 |
| 2020 | 57.418 | 56.439 | 58.397 |

**Supplemental Table 5: Region‐Stratified** **COPD-Related Age-Adjusted Mortality Rates per 100,000 in the United States, 1999 to 2020**

| Age Adjusted Rate (95% CI) NORTHEAST | | | |
| --- | --- | --- | --- |
| Year | Age Adjusted Rate | Age Adjusted Rate Lower 95% Confidence Interval | Age Adjusted Rate Upper 95% Confidence Interval |
| 1999 | 105.589 | 104.549 | 106.629 |
| 2000 | 104.912 | 103.881 | 105.943 |
| 2001 | 103.143 | 102.126 | 104.16 |
| 2002 | 102.164 | 101.157 | 103.171 |
| 2003 | 100.444 | 99.451 | 101.438 |
| 2004 | 100.408 | 99.418 | 101.398 |
| 2005 | 101.949 | 100.956 | 102.943 |
| 2006 | 96.469 | 95.507 | 97.432 |
| 2007 | 95.275 | 94.323 | 96.226 |
| 2008 | 98.127 | 97.167 | 99.087 |
| 2009 | 94.21 | 93.273 | 95.147 |
| 2010 | 93.953 | 93.021 | 94.884 |
| 2011 | 96.019 | 95.084 | 96.955 |
| 2012 | 93.914 | 92.997 | 94.83 |
| 2013 | 93.019 | 92.113 | 93.924 |
| 2014 | 88.977 | 88.097 | 89.857 |
| 2015 | 91.886 | 90.997 | 92.775 |
| 2016 | 88.845 | 87.977 | 89.714 |
| 2017 | 89.124 | 88.268 | 89.98 |
| 2018 | 86.944 | 86.107 | 87.782 |
| 2019 | 85.062 | 84.241 | 85.883 |
| 2020 | 92.386 | 91.536 | 93.236 |

| Age Adjusted Rate (95% CI) MIDWEST | | | |
| --- | --- | --- | --- |
| Year | Age Adjusted Rate | Age Adjusted Rate Lower 95% Confidence Interval | Age Adjusted Rate Upper 95% Confidence Interval |
| 1999 | 124.769 | 123.704 | 125.834 |
| 2000 | 121.856 | 120.807 | 122.906 |
| 2001 | 122.652 | 121.604 | 123.699 |
| 2002 | 123.54 | 122.494 | 124.586 |
| 2003 | 123.251 | 122.212 | 124.29 |
| 2004 | 120.595 | 119.572 | 121.618 |
| 2005 | 126.838 | 125.794 | 127.882 |
| 2006 | 123.143 | 122.121 | 124.165 |
| 2007 | 121.202 | 120.194 | 122.209 |
| 2008 | 128.754 | 127.723 | 129.784 |
| 2009 | 122.9 | 121.898 | 123.902 |
| 2010 | 123.867 | 122.867 | 124.868 |
| 2011 | 128.639 | 127.627 | 129.65 |
| 2012 | 126.708 | 125.714 | 127.703 |
| 2013 | 128.452 | 127.459 | 129.445 |
| 2014 | 125.708 | 124.734 | 126.681 |
| 2015 | 128.756 | 127.778 | 129.733 |
| 2016 | 126.075 | 125.114 | 127.035 |
| 2017 | 127.611 | 126.656 | 128.566 |
| 2018 | 126.13 | 125.192 | 127.068 |
| 2019 | 122.923 | 122.006 | 123.84 |
| 2020 | 136.859 | 135.897 | 137.82 |

| Age Adjusted Rate (95% CI) SOUTH | | | |
| --- | --- | --- | --- |
| Year | Age Adjusted Rate | Age Adjusted Rate Lower 95% Confidence Interval | Age Adjusted Rate Upper 95% Confidence Interval |
| 1999 | 120.945 | 120.079 | 121.81 |
| 2000 | 120.149 | 119.291 | 121.007 |
| 2001 | 120.585 | 119.732 | 121.437 |
| 2002 | 122.705 | 121.851 | 123.559 |
| 2003 | 123.354 | 122.505 | 124.203 |
| 2004 | 118.601 | 117.775 | 119.426 |
| 2005 | 124.475 | 123.638 | 125.311 |
| 2006 | 119.408 | 118.598 | 120.219 |
| 2007 | 119.395 | 118.592 | 120.197 |
| 2008 | 122.792 | 121.988 | 123.596 |
| 2009 | 121.107 | 120.317 | 121.897 |
| 2010 | 122.884 | 122.095 | 123.673 |
| 2011 | 122.453 | 121.678 | 123.228 |
| 2012 | 122.645 | 121.88 | 123.41 |
| 2013 | 125.053 | 124.292 | 125.814 |
| 2014 | 121.25 | 120.512 | 121.989 |
| 2015 | 124.542 | 123.803 | 125.28 |
| 2016 | 124.775 | 124.046 | 125.504 |
| 2017 | 127.195 | 126.469 | 127.92 |
| 2018 | 125.079 | 124.372 | 125.787 |
| 2019 | 122.509 | 121.818 | 123.199 |
| 2020 | 132.71 | 132 | 133.42 |

| Age Adjusted Rate (95% CI) WEST | | | |
| --- | --- | --- | --- |
| Year | Age Adjusted Rate | Age Adjusted Rate Lower 95% Confidence Interval | Age Adjusted Rate Upper 95% Confidence Interval |
| 1999 | 122.821 | 121.655 | 123.987 |
| 2000 | 117.239 | 116.11 | 118.368 |
| 2001 | 117.163 | 116.048 | 118.277 |
| 2002 | 117.278 | 116.174 | 118.383 |
| 2003 | 117.853 | 116.759 | 118.947 |
| 2004 | 112.749 | 111.689 | 113.81 |
| 2005 | 116.931 | 115.865 | 117.997 |
| 2006 | 111.852 | 110.82 | 112.883 |
| 2007 | 109.91 | 108.899 | 110.92 |
| 2008 | 110.918 | 109.914 | 111.921 |
| 2009 | 106.562 | 105.591 | 107.533 |
| 2010 | 107.259 | 106.294 | 108.224 |
| 2011 | 107.933 | 106.98 | 108.885 |
| 2012 | 104.473 | 103.55 | 105.396 |
| 2013 | 106.458 | 105.541 | 107.375 |
| 2014 | 101.12 | 100.241 | 101.999 |
| 2015 | 104.038 | 103.16 | 104.916 |
| 2016 | 103.493 | 102.629 | 104.357 |
| 2017 | 102.834 | 101.984 | 103.684 |
| 2018 | 99.245 | 98.424 | 100.066 |
| 2019 | 96.089 | 95.293 | 96.886 |
| 2020 | 101.638 | 100.83 | 102.446 |

| Age Adjusted Rate (95% CI) URBAN | | | |
| --- | --- | --- | --- |
| Year | Age Adjusted Rate | Age Adjusted Rate Lower 95% Confidence Interval | Age Adjusted Rate Upper 95% Confidence Interval |
| 1999 | 114.628 | 114.066 | 115.189 |
| 2000 | 111.909 | 111.358 | 112.46 |
| 2001 | 111.427 | 110.881 | 111.972 |
| 2002 | 111.822 | 111.279 | 112.364 |
| 2003 | 111.63 | 111.092 | 112.167 |
| 2004 | 108.498 | 107.972 | 109.024 |
| 2005 | 112.351 | 111.82 | 112.881 |
| 2006 | 107.866 | 107.35 | 108.381 |
| 2007 | 106.316 | 105.809 | 106.823 |
| 2008 | 109.771 | 109.261 | 110.281 |
| 2009 | 105.969 | 105.473 | 106.466 |
| 2010 | 107.013 | 106.518 | 107.508 |
| 2011 | 108.285 | 107.794 | 108.777 |
| 2012 | 106.413 | 105.932 | 106.894 |
| 2013 | 107.999 | 107.52 | 108.477 |
| 2014 | 104.022 | 103.559 | 104.486 |
| 2015 | 106.258 | 105.796 | 106.721 |
| 2016 | 104.949 | 104.495 | 105.404 |
| 2017 | 105.648 | 105.199 | 106.097 |
| 2018 | 103.364 | 102.926 | 103.801 |
| 2019 | 100.319 | 99.893 | 100.744 |
| 2020 | 108.968 | 108.529 | 109.407 |

| Age Adjusted Rate (95% CI) RURAL | | | |
| --- | --- | --- | --- |
| Year | Age Adjusted Rate | Age Adjusted Rate Lower 95% Confidence Interval | Age Adjusted Rate Upper 95% Confidence Interval |
| 1999 | 135.875 | 134.682 | 137.068 |
| 2000 | 135.632 | 134.445 | 136.819 |
| 2001 | 137.534 | 136.344 | 138.724 |
| 2002 | 139.995 | 138.8 | 141.189 |
| 2003 | 140.571 | 139.381 | 141.762 |
| 2004 | 136.718 | 135.549 | 137.886 |
| 2005 | 144.887 | 143.692 | 146.083 |
| 2006 | 138.967 | 137.805 | 140.128 |
| 2007 | 139.681 | 138.524 | 140.837 |
| 2008 | 145.104 | 143.933 | 146.275 |
| 2009 | 142.373 | 141.22 | 143.527 |
| 2010 | 142.995 | 141.845 | 144.144 |
| 2011 | 145.858 | 144.706 | 147.01 |
| 2012 | 146.273 | 145.13 | 147.417 |
| 2013 | 147.869 | 146.728 | 149.009 |
| 2014 | 144.646 | 143.527 | 145.766 |
| 2015 | 151.489 | 150.353 | 152.624 |
| 2016 | 151.165 | 150.038 | 152.292 |
| 2017 | 154.541 | 153.412 | 155.671 |
| 2018 | 152.603 | 151.492 | 153.713 |
| 2019 | 151.723 | 150.626 | 152.82 |
| 2020 | 164.934 | 163.797 | 166.072 |

| Age Adjusted Rate (95% CI) STATES | | | |
| --- | --- | --- | --- |
| State | Age Adjusted Rate | Age Adjusted Rate Lower 95% Confidence Interval | Age Adjusted Rate Upper 95% Confidence Interval |
| Alabama | 130.555 | 129.735 | 131.375 |
| Alaska | 110.537 | 107.79 | 113.285 |
| Arizona | 98.937 | 98.32 | 99.554 |
| Arkansas | 136.824 | 135.77 | 137.877 |
| California | 102.205 | 101.926 | 102.483 |
| Colorado | 131.853 | 130.96 | 132.746 |
| Connecticut | 92.004 | 91.243 | 92.765 |
| Delaware | 118.589 | 116.822 | 120.355 |
| District of Columbia | 70.841 | 69.038 | 72.644 |
| Florida | 104.448 | 104.122 | 104.774 |
| Georgia | 108.212 | 107.616 | 108.807 |
| Hawaii | 50.041 | 49.128 | 50.954 |
| Idaho | 123.392 | 121.93 | 124.853 |
| Illinois | 101.494 | 101.043 | 101.946 |
| Indiana | 151.204 | 150.435 | 151.972 |
| Iowa | 131.765 | 130.797 | 132.734 |
| Kansas | 126.125 | 125.087 | 127.162 |
| Kentucky | 178.791 | 177.772 | 179.81 |
| Louisiana | 108.471 | 107.671 | 109.27 |
| Maine | 134.738 | 133.287 | 136.189 |
| Maryland | 102.42 | 101.731 | 103.108 |
| Massachusetts | 85.172 | 84.626 | 85.718 |
| Michigan | 124.052 | 123.506 | 124.599 |
| Minnesota | 109.173 | 108.458 | 109.889 |
| Mississippi | 143.963 | 142.837 | 145.088 |
| Missouri | 133.365 | 132.639 | 134.091 |
| Montana | 136.908 | 135.144 | 138.671 |
| Nebraska | 135.057 | 133.731 | 136.383 |
| Nevada | 127.157 | 125.962 | 128.351 |
| New Hampshire | 121.059 | 119.57 | 122.548 |
| New Jersey | 85.593 | 85.112 | 86.075 |
| New Mexico | 113.879 | 112.678 | 115.081 |
| New York | 83.27 | 82.95 | 83.59 |
| North Carolina | 128.006 | 127.414 | 128.598 |
| North Dakota | 124.632 | 122.611 | 126.653 |
| Ohio | 145.681 | 145.139 | 146.223 |
| Oklahoma | 183.261 | 182.159 | 184.362 |
| Oregon | 125.092 | 124.216 | 125.969 |
| Pennsylvania | 111.259 | 110.831 | 111.686 |
| Rhode Island | 127.558 | 125.936 | 129.181 |
| South Carolina | 127.886 | 127.052 | 128.72 |
| South Dakota | 128.95 | 127.072 | 130.829 |
| Tennessee | 152.345 | 151.567 | 153.123 |
| Texas | 121.384 | 120.989 | 121.779 |
| Utah | 74.85 | 73.852 | 75.848 |
| Vermont | 141.083 | 138.821 | 143.344 |
| Virginia | 100.905 | 100.317 | 101.494 |
| Washington | 120.838 | 120.146 | 121.53 |
| West Virginia | 195.015 | 193.521 | 196.509 |
| Wisconsin | 109.13 | 108.458 | 109.803 |
| Wyoming | 156.644 | 153.901 | 159.387 |

**Supplemental Table 3: Annual percent change (APC) of COPD related age-adjusted mortality rates per 100,000 in the United States, 1999 to 2020**

| **Year Interval** | **APC (95% CI)** |
| --- | --- |
| **Overall** |  |
| 1999-2020 | -0.152 (-0.292 to –0.013) |
| **Male** |  |
| 1999-2020 | -0.881 (-1.065 to –0.695) |
| **Female** |  |
| 1999-2020 | 0.374 (0.24 to 0.50) |
| **NH White** |  |
| 1999-2020 | 0.159 (0.036 to 0.281) |
| **NH Black or African American** |  |
| 1999-2018 | -0.026 (-0.241 to 0.189) |
| 2018-2020 | 9.2 (2.97 to 15.796) |
| **NH Asian or Pacific Islander** |  |
| 1999-2020 | -1.98 (-2.28 to –1.679) |
| **NH American Indian or Alaska Native** |  |
| 1999-2004 | 3.862 (0.574 to 7.259) |
| 2004-2020 | 0.509 (0.105 to 0.914) |
| **Hispanic or Latino** |  |
| 1999-2018 | -1.39 (-1.594 to –1.185) |
| 2018-2020 | 7.88 (2.364 to 13.709) |
| **Rural areas** |  |
| 1999-2020 | 0.711 (0.56 to 0.863) |
| **Urban areas** |  |
| 1999-2020 | -0.383 (-0.523 to –0.243) |

**Supplementary Figure 1: COPD-Related Annual Percentage Change (APC) in the United States from 1999 to 2020 stratified by (A) Overall (B) Sex (C) Race and (D) Census Region (E) Urban (F) Rural**


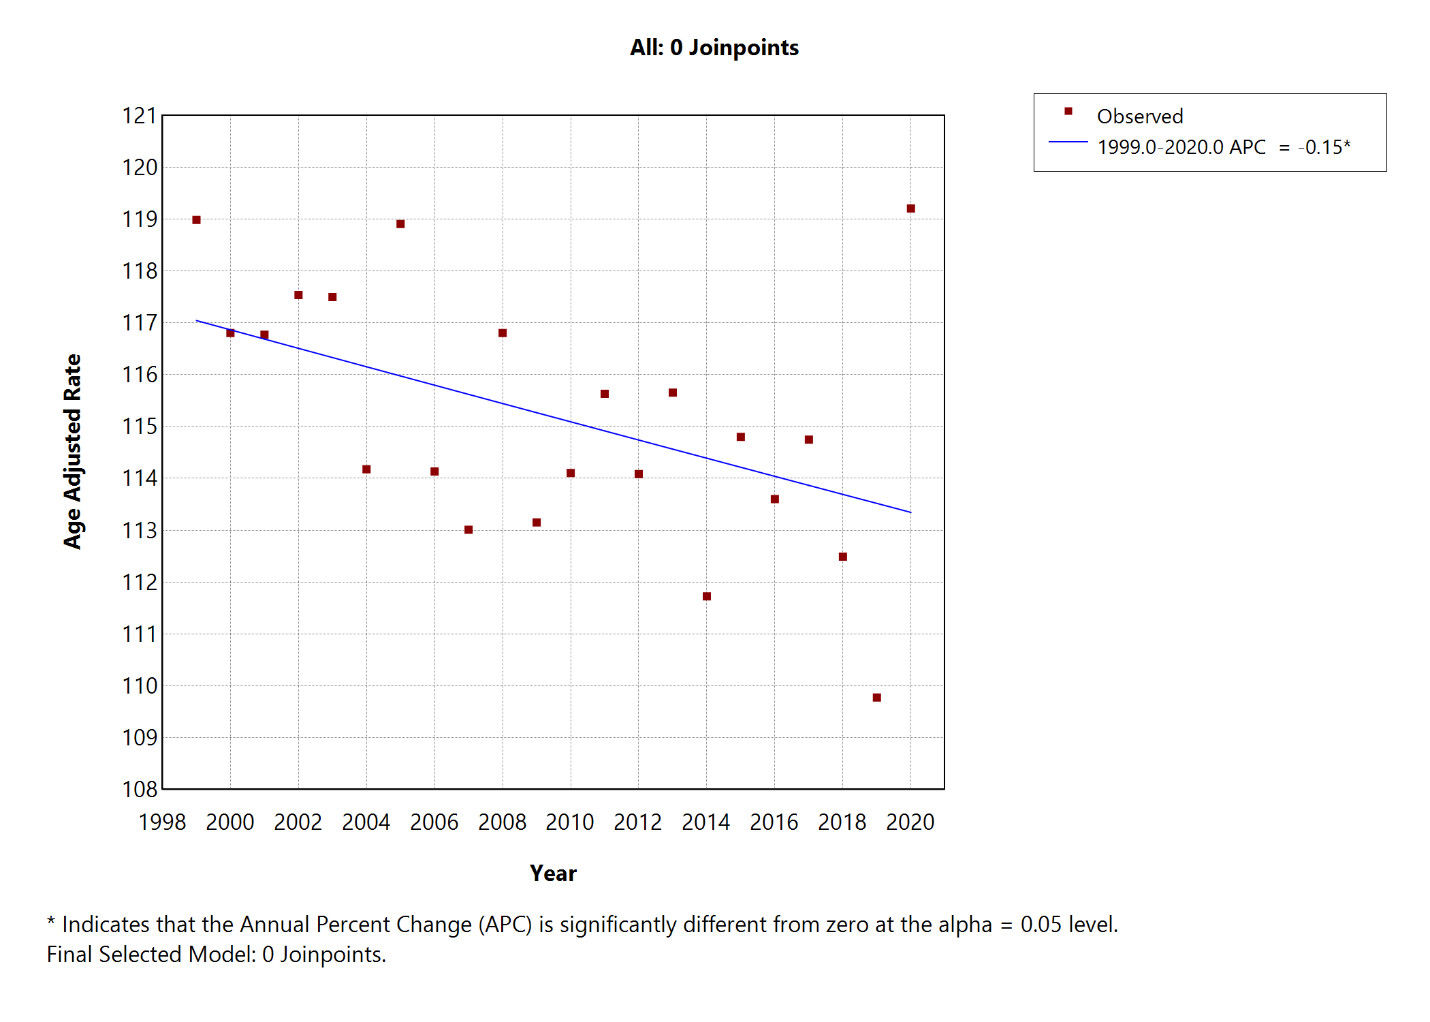

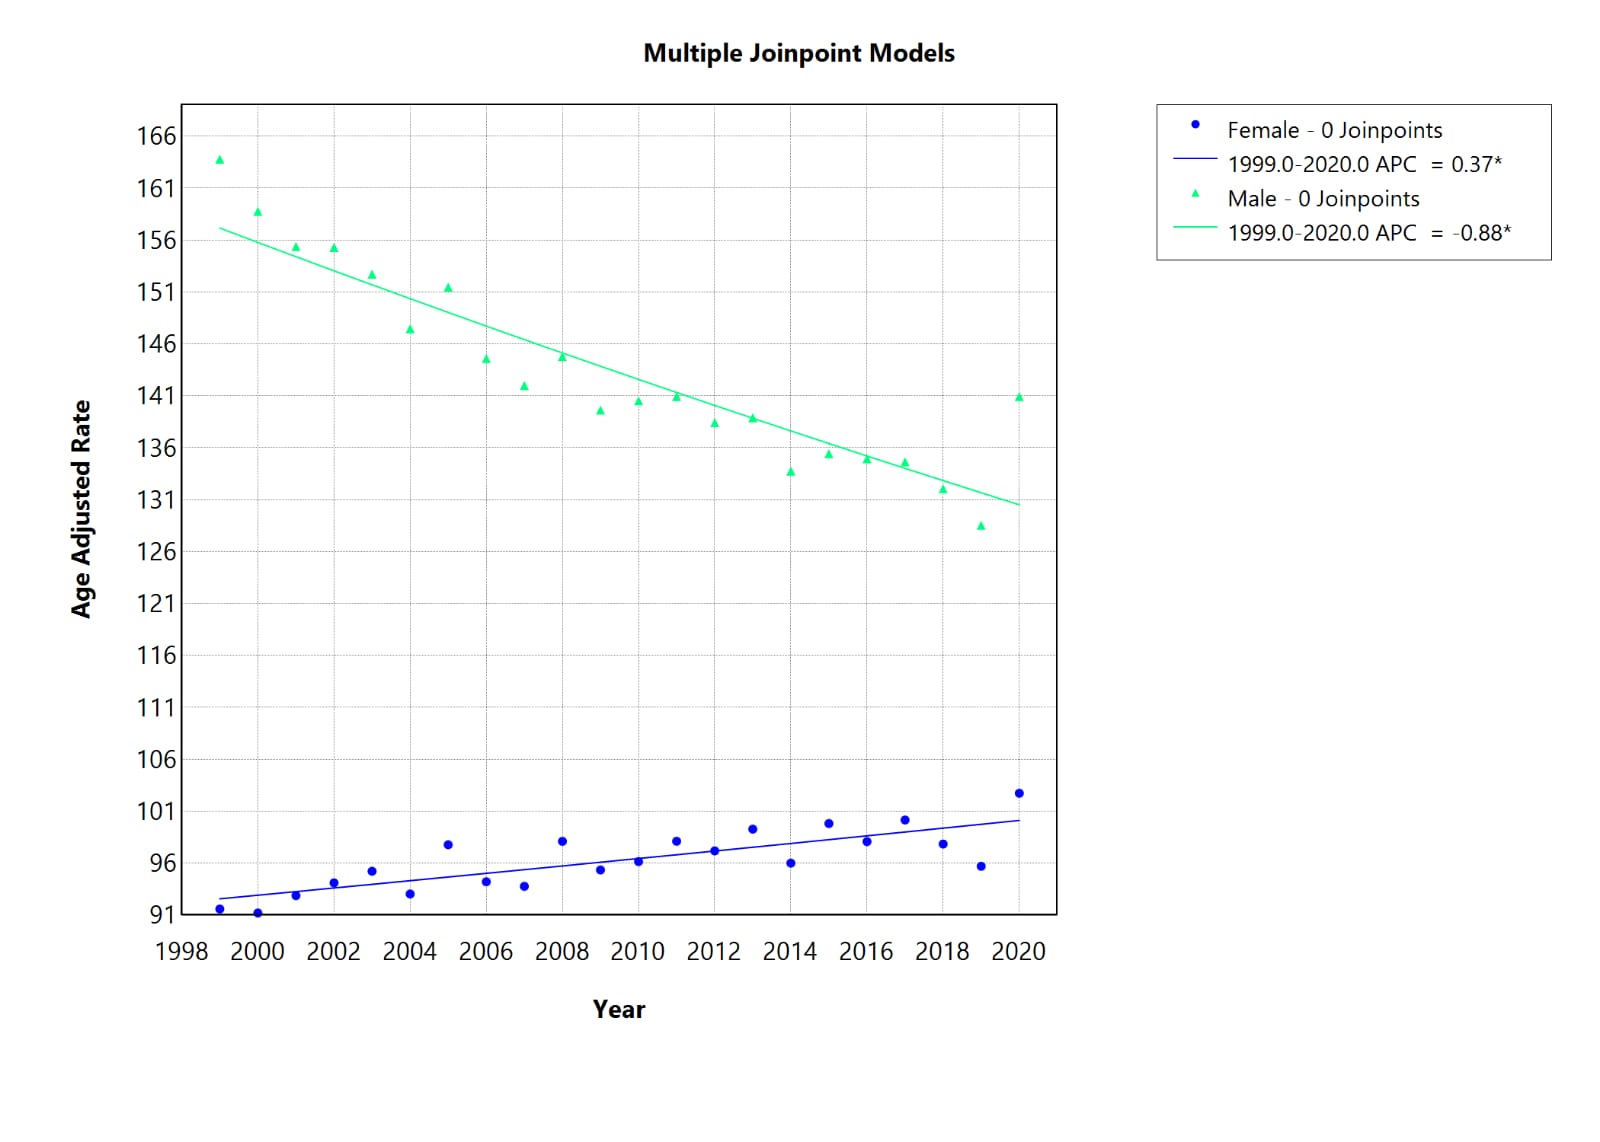

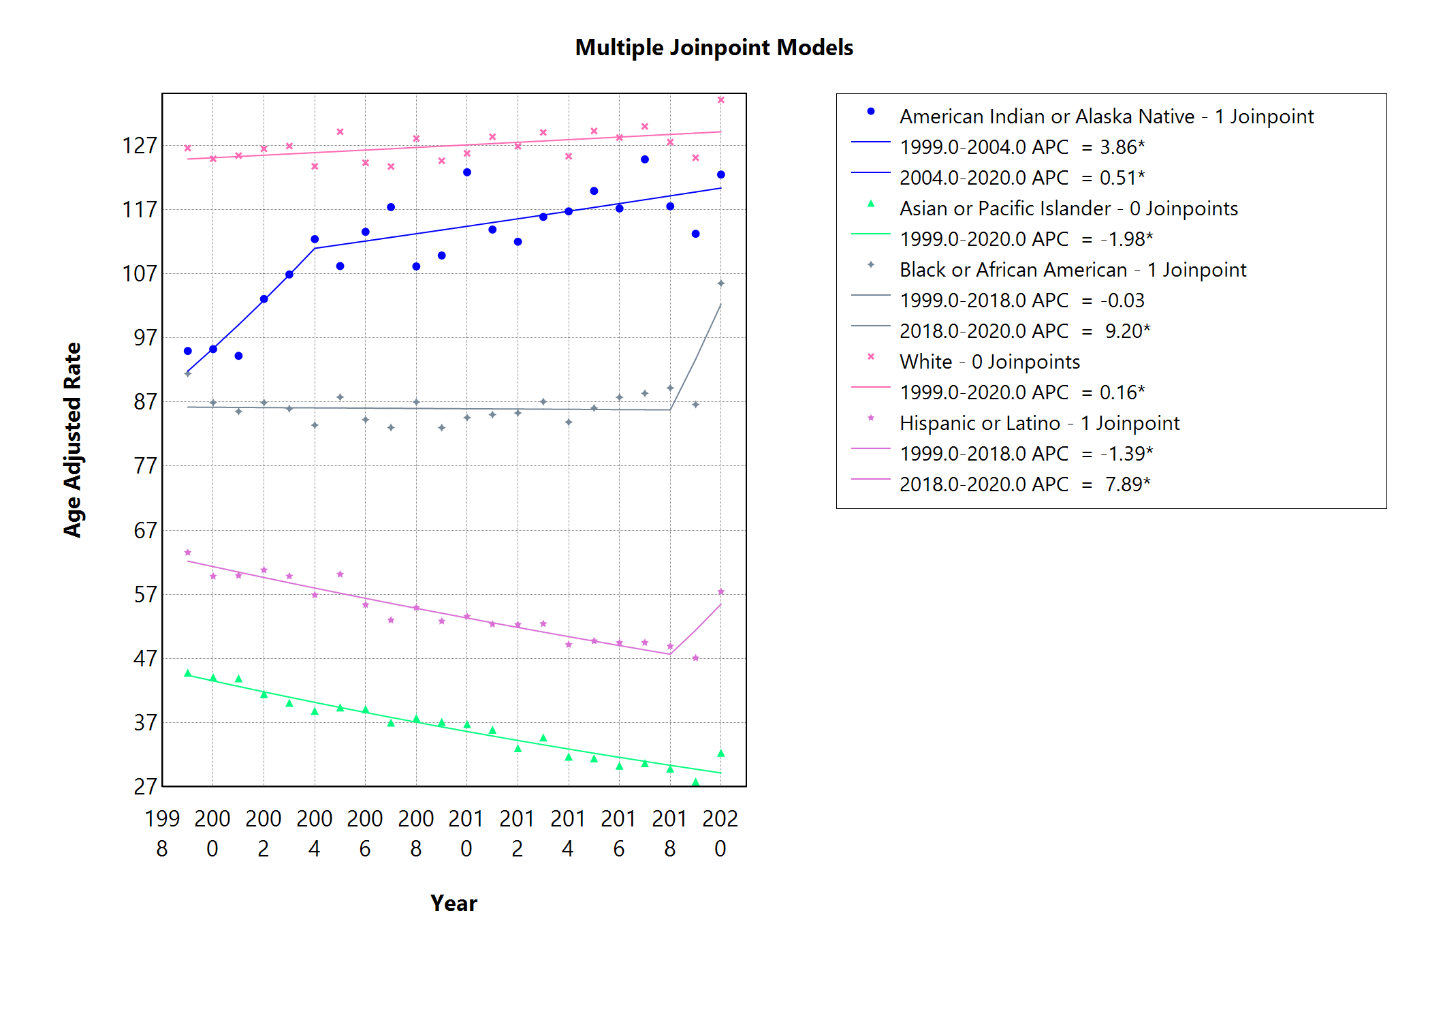

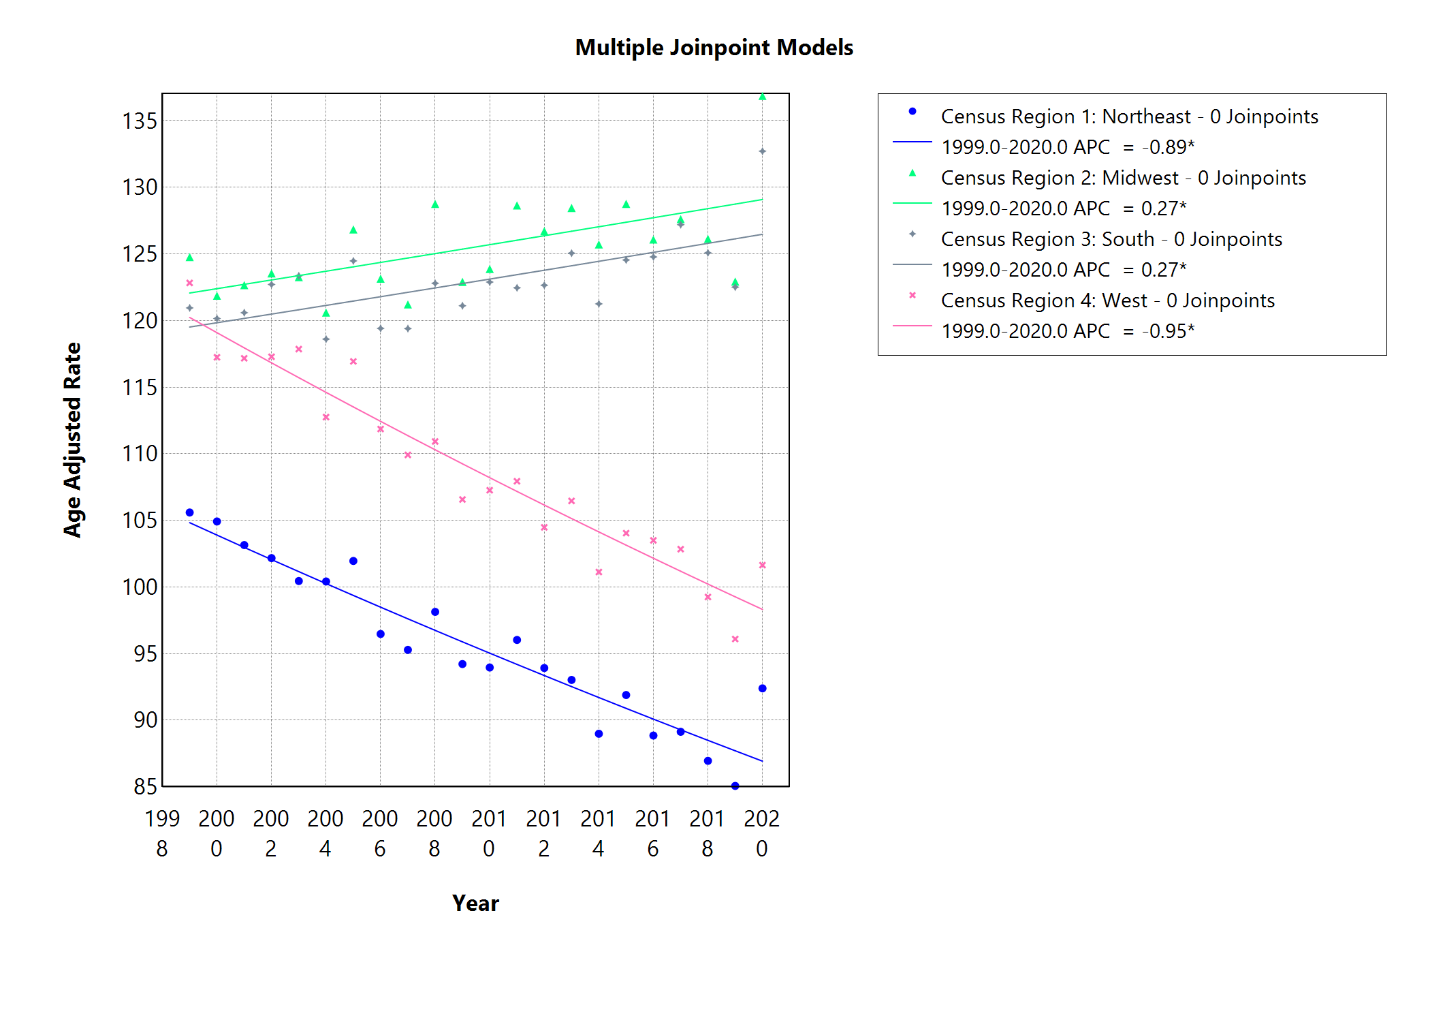


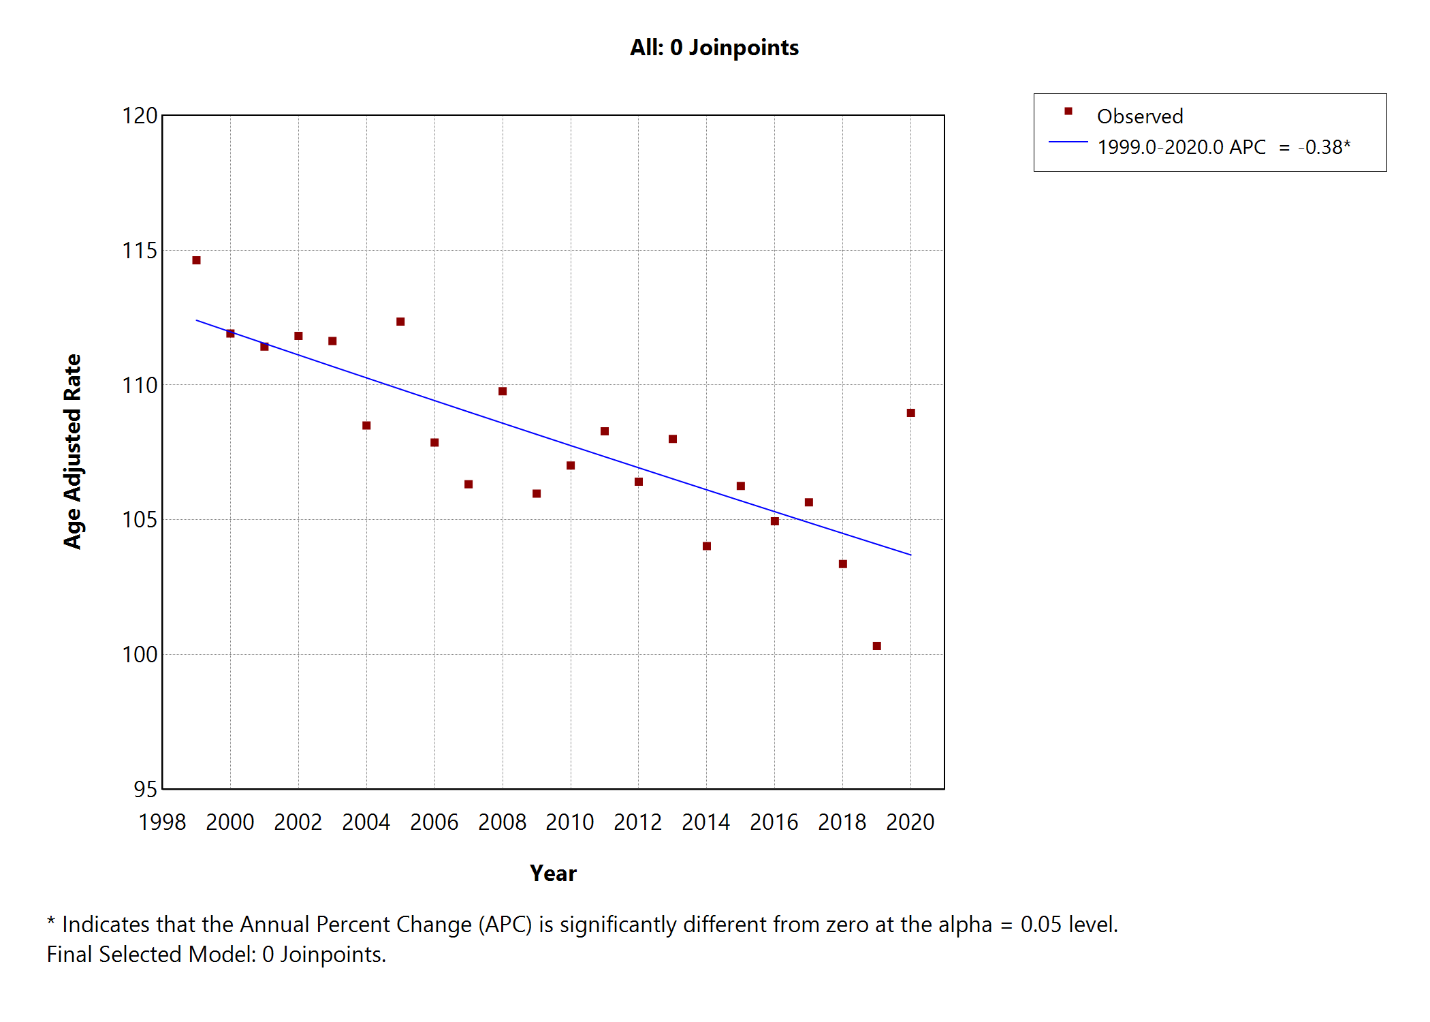


URBAN


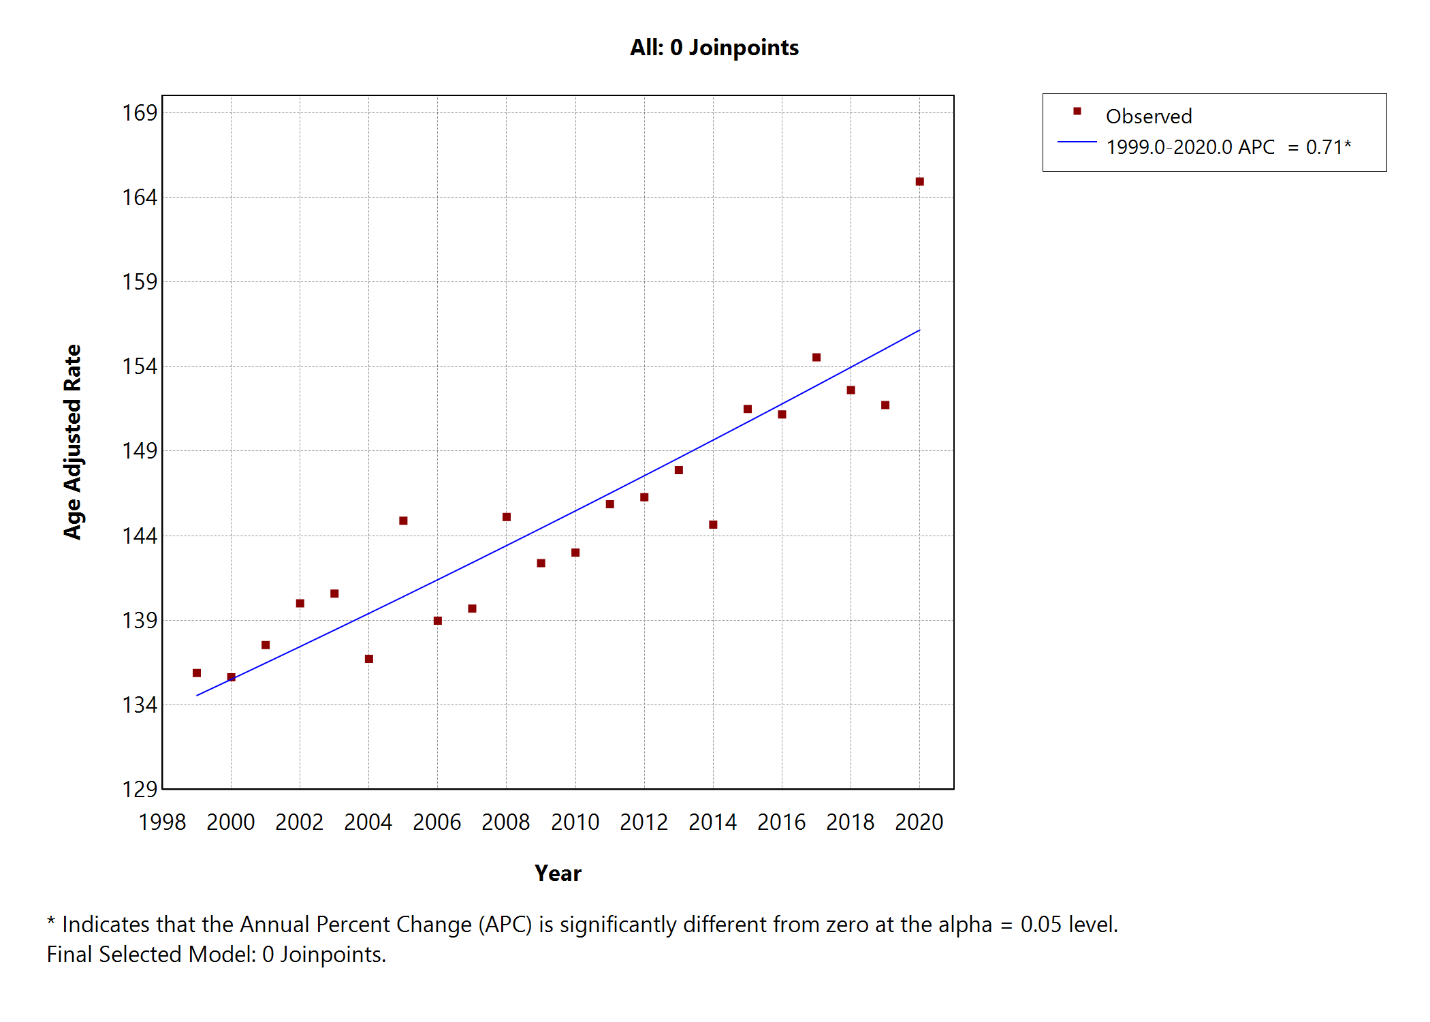


RURAL
